# Supplementary material for: Psychomotor Impairment Detection via Finger Interactions with a Computer Keyboard During Natural Typing
Source: PubMed Central journal article supplement (PMC5381750; doi:10.1038/srep09678), 2015-04-16
Supplement: srep09678-s1.pdf [file srep09678-s1.pdf]

## **Psychomotor Impairment Detection via Finger Interactions with a Computer Keyboard During Natural Typing**

L. Giancardo, A. Sanchez-Ferro, I. Butterworth, C. S. Mendoza, J. M. Hooker

### **Additional material**

The datasets are available at the following address:  
<https://www.neuroqwerty.com/paperSI/datasets.zip>

The form used for the experiment is viewable here:  
[https://www.neuroqwerty.com/paperSI/sleep\\_test/](https://www.neuroqwerty.com/paperSI/sleep_test/)

The plugin and source code to acquire the data is downloadable here:  
[https://www.neuroqwerty.com/paperSI/sleep\\_test/chromeExt-v0\\_3.crx](https://www.neuroqwerty.com/paperSI/sleep_test/chromeExt-v0_3.crx)
